# Supplementary material
Source: PubMed Central journal article supplement (PMC8570993)
Supplement: NIHMS1714180-supplement-2.pdf [file NIHMS1714180-supplement-2.pdf]

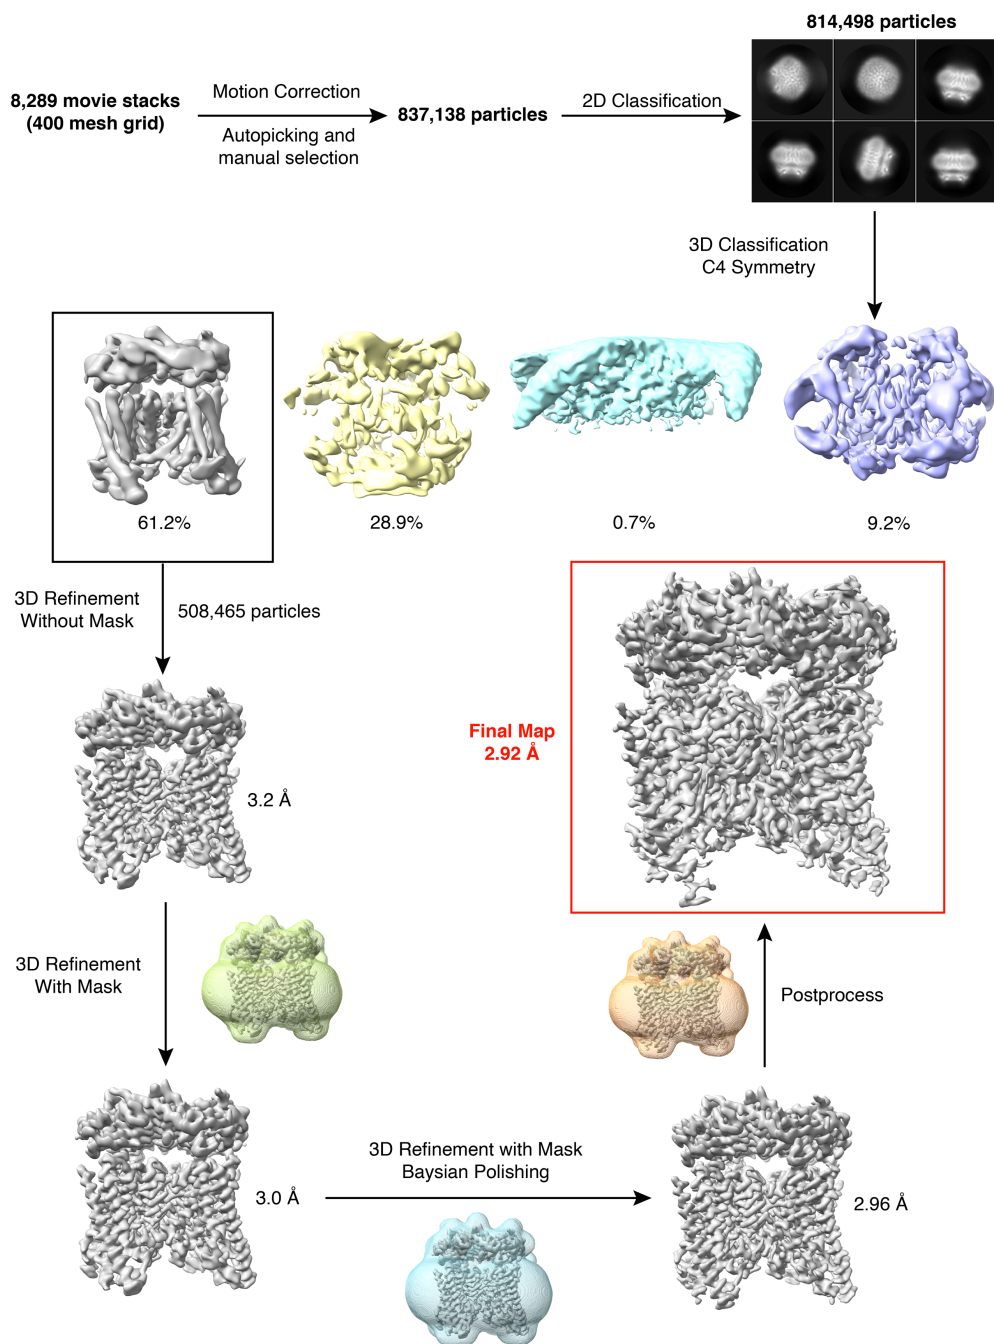

**Figure S1. Processing of data acquired from 300 kV cryo-TEM, Related to Figure 1 and Table 1.** The data processing workflow in RELION 3. The cryo-EM 3D classes as well as the masks used for refinement are shown. After the RELION 3 refinement, the final cryo-EM map was sharpened using post-process with a B-factor value of  $-130 \text{ \AA}^2$ .

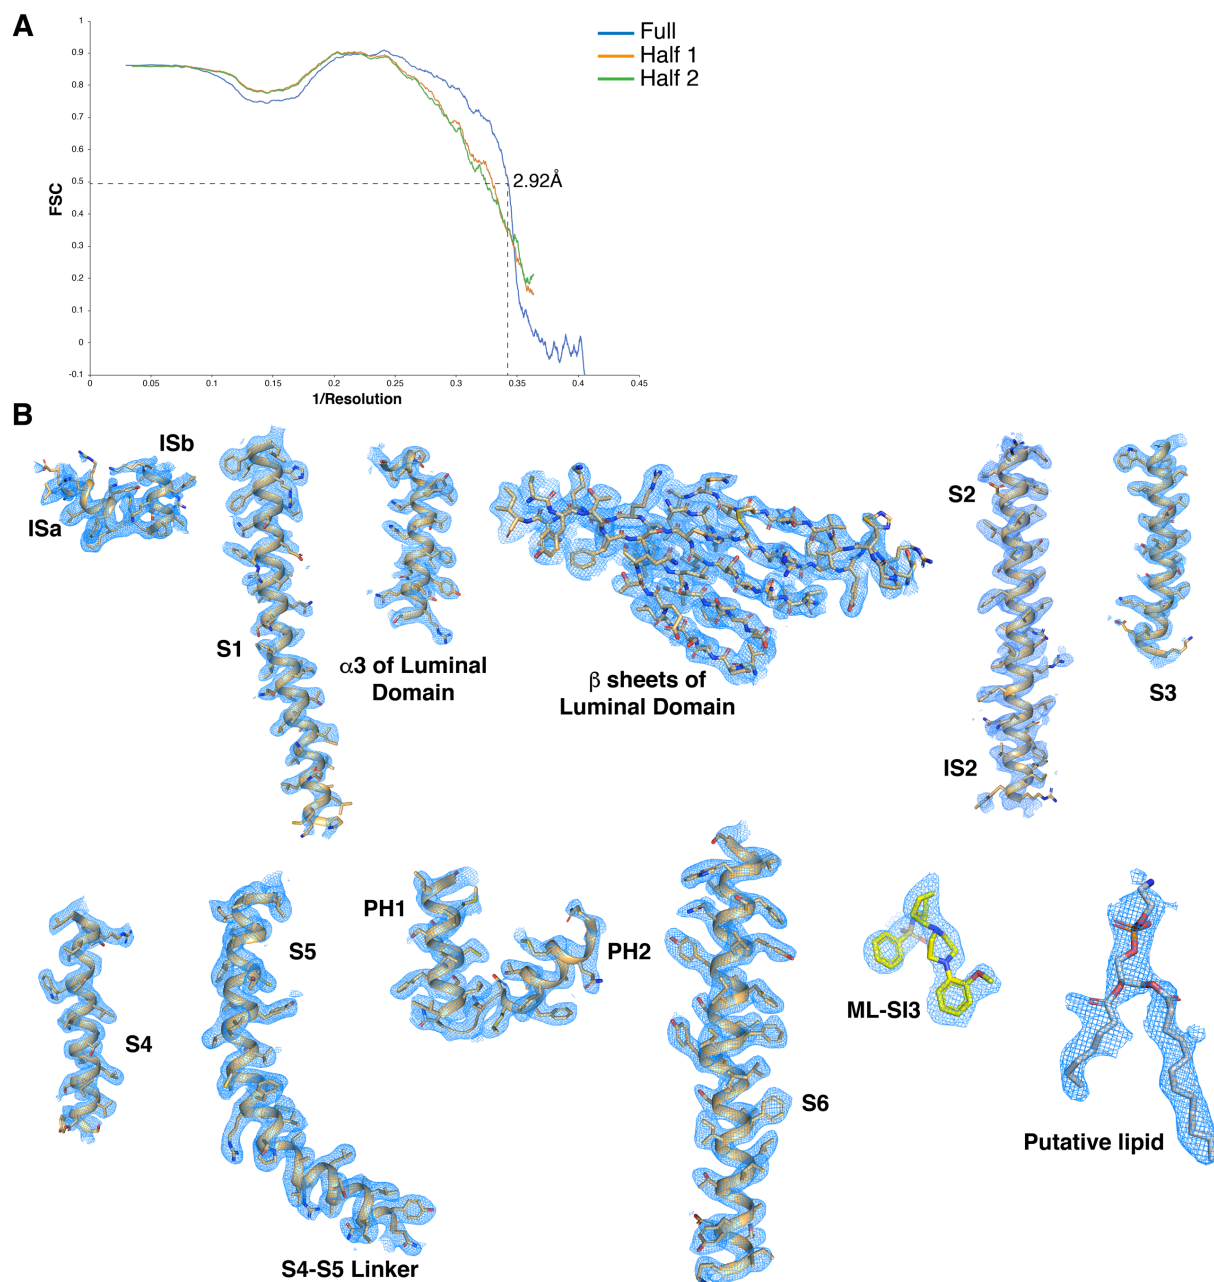

**Figure S2. Cryo-EM map of the structural elements of TRPML1–ML-SI3, Related to Figure 1. (A)** The FSC curves calculated between the refined structural model and the half map used for refinement (orange), the other half map (green), and the full map (blue). **(B)** The major structural features of TRPML1–ML-SI3. The density map and model are shown as mesh and cartoons, respectively. Cryo-EM maps are contoured at the  $4\sigma$  level.

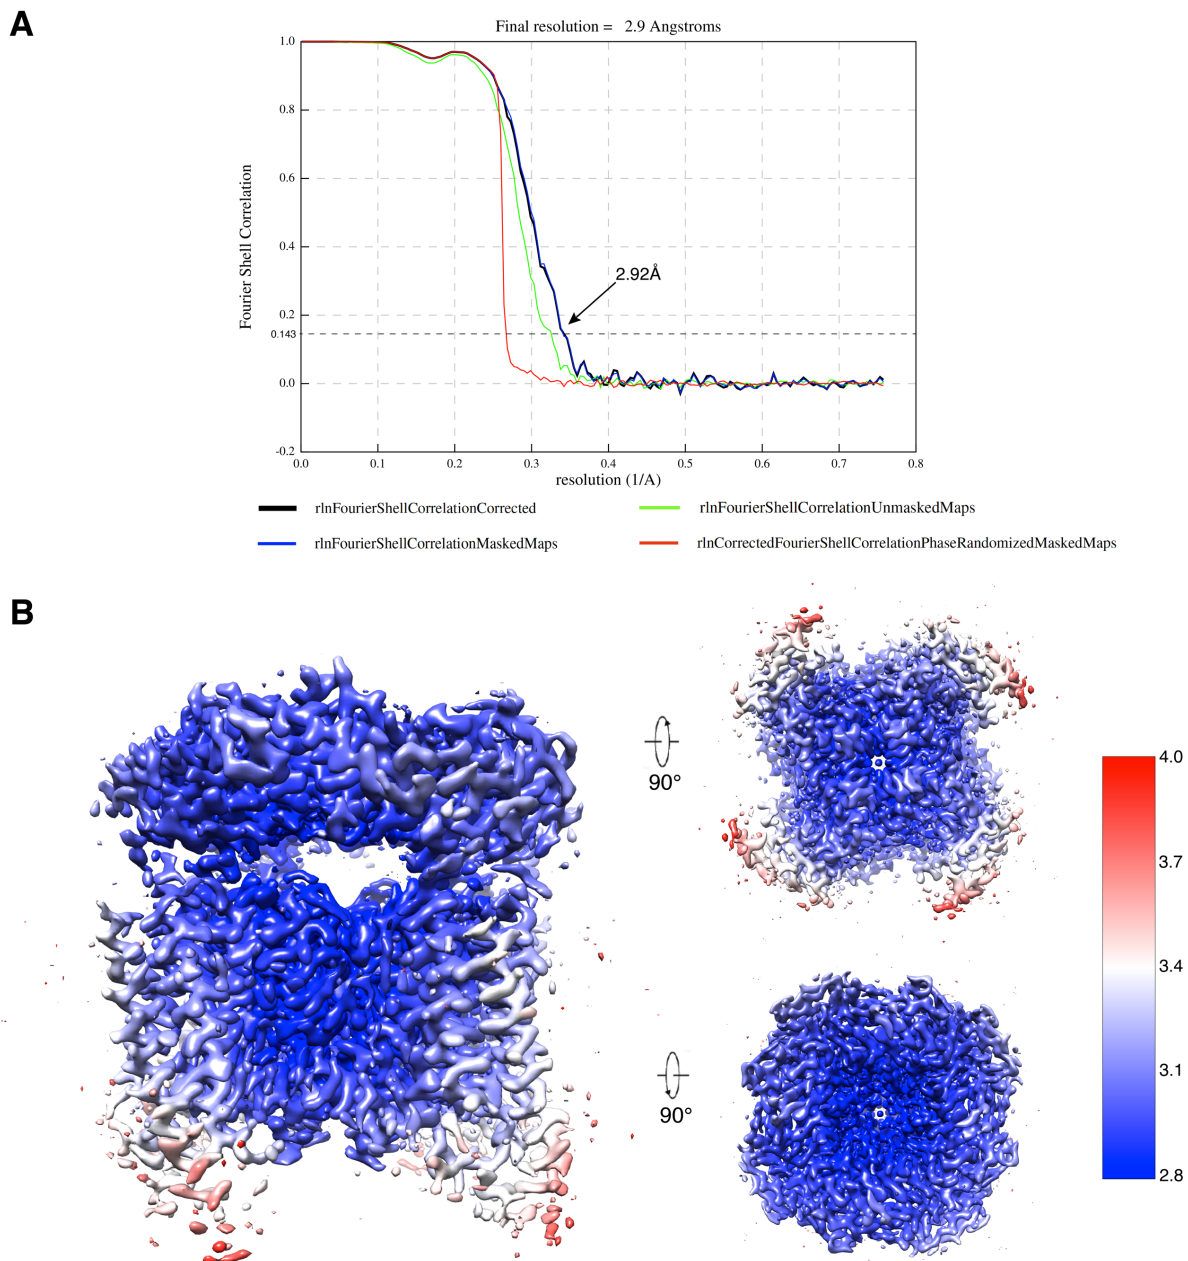

**Figure S3. FSC curve and estimation of the local resolution, Related to Figure 1. (A)** FSC curve as a function of resolution using RELION 3 output. **(B)** Density maps of the structure of TRPML1–ML–SI3, colored by local resolution estimation using RELION 3.

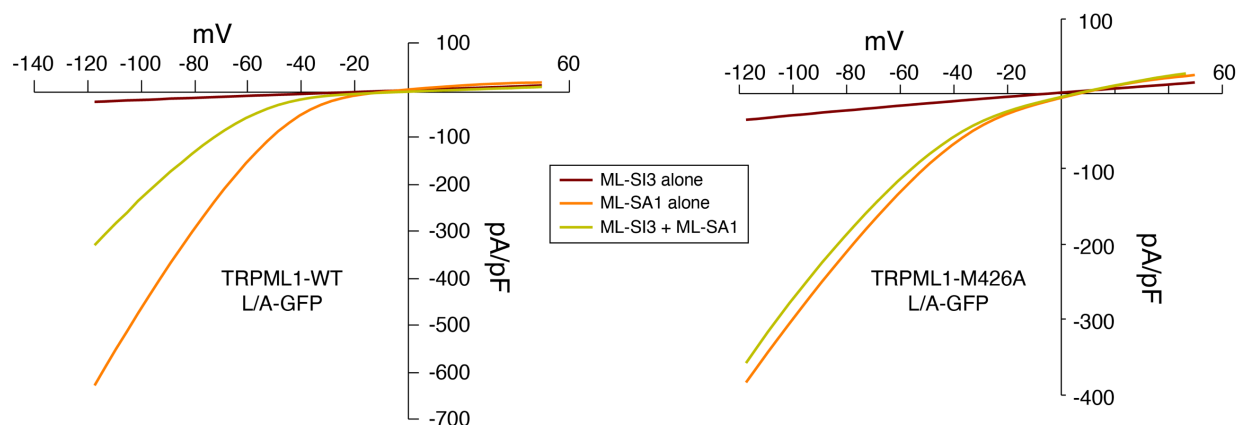

**Figure S4. Current Voltage relationship of TRPML1 ‘WT’ and ‘M426A-mutant’ L/A-GFP cells, Related to Figure 3.** Typical inward rectification of TRPML1 currents with agonist ML-SA1 (10  $\mu$ M) are reduced during co-application of antagonist ML-SI3 (10  $\mu$ M) in TRPML1 ‘WT’ L/A-GFP cells, left. Cells expressing TRPML1 L/A-GFP containing the M426A mutation respond similarly to agonist treatment, but antagonist treatment fails to significantly reduce inward rectification, right. Maximal response determined at -100 mV with 10  $\mu$ M ML-SA1.
